# Supplementary material for: Seasonal Interplay of Water Mass Mixing and Nutrient Dynamics in an Arctic Fjord: A Case Study of Kongsfjorden, Svalbard
Source: Copernicus journal article supplement (doi:10.5194/egusphere-2025-2845), 2025-06-27

**Figure S1.** Relationship between salinity and (a) observed silicate concentration and (b)  $\Delta$ Silicate in surface waters of Kongsfjorden during summer 2023.

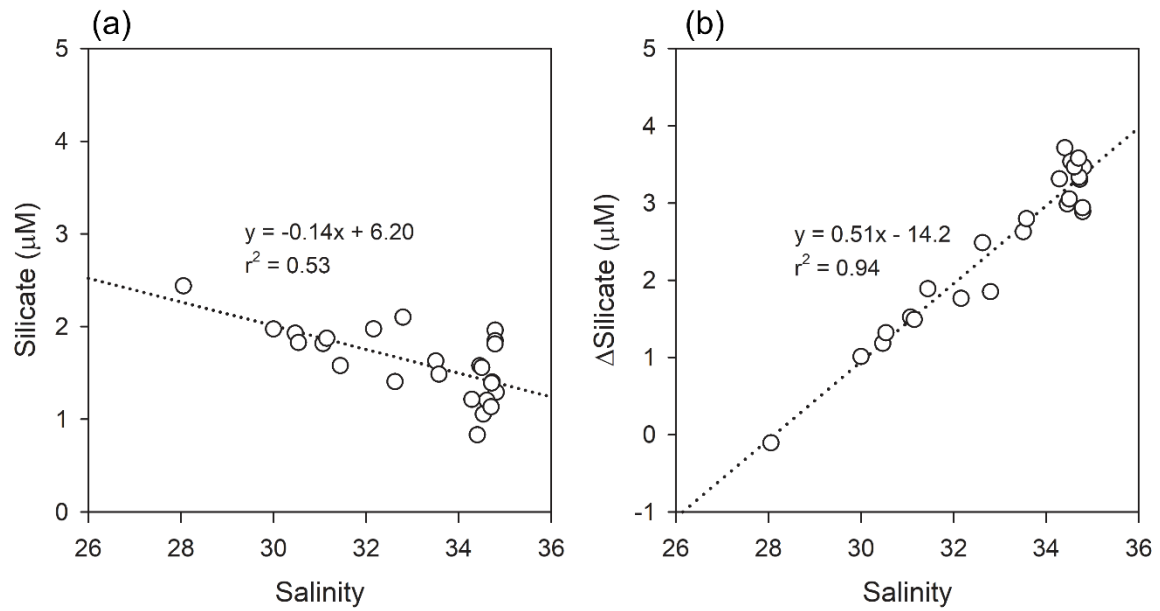

Supplement: Supplementary file [file egusphere-2025-2845-AC2-supplement.pdf]
